# Supplementary material
Source: PubMed Central journal article supplement (PMC3421856)
Supplement: AAC.00447-12_zac999101179so1.pdf [file AAC.00447-12_zac999101179so1.pdf]

## Supplemental materials

### S1. No defect in UTI89 invasion following implantation

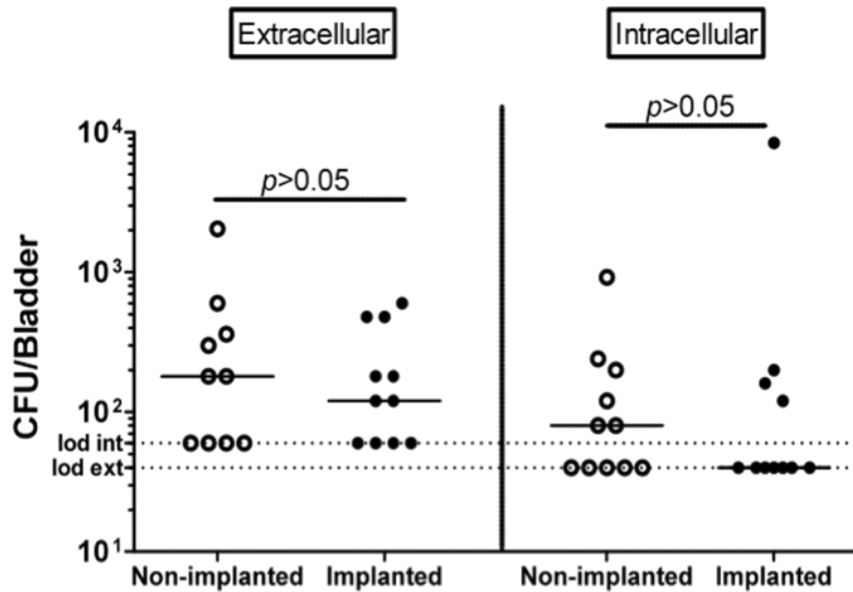

Graph represents bacterial titers from homogenized bladders from non-implanted ( $\circ$ ) or implanted ( $\bullet$ ) animals infected with UTI89 3hpi following gentamicin protection assay. Horizontal dashed lines represent the limit of detection (lod) for viable bacteria (Int=intracellular, Ext=Extracellular). Each symbol represents a mouse from two independent experiments with  $n=5$ /condition. The horizontal bars represent the median of each dataset;  $p$  value by the Mann Whitney U test.

## S2. IBC and filamentation occur following urinary catheterization

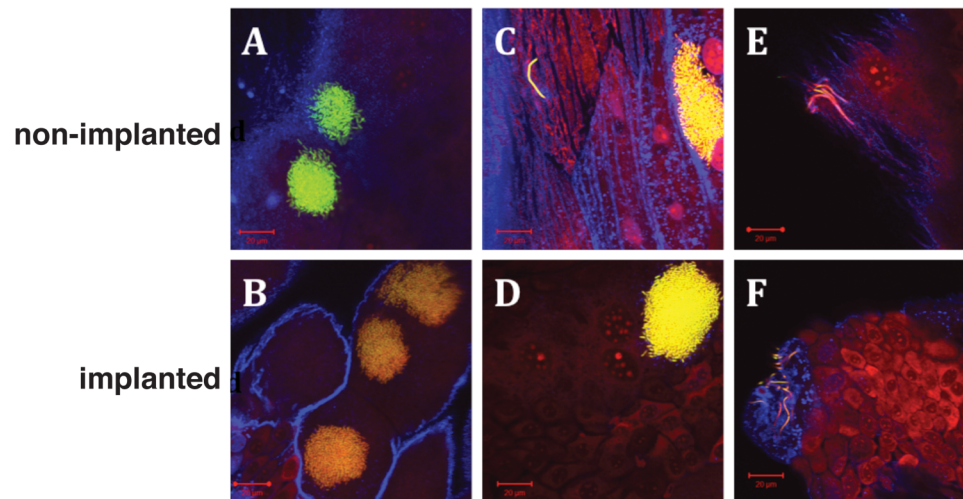

Representative CLSM images of whole bladders from non-implanted and implanted animals infected with UTI89 ectopically expressing GFP (Green), stained with DNA dye SYTO83 (Red) and Alexa-fluor 633-conjugate of WGA (Blue) reveal the presence of multiple IBCs within single umbrella cells (**A-B**), that unlike non-implanted bladders (**C**), the underlying epithelium is exposed following urinary catheterization (**D-F**), depict the absence of bacterial colonization of the exposed underlying epithelium in implanted animals (**D-F**), and the presence of filamenting bacteria in umbrella cells (**E-F**). Scale bar =20µm

### S3. UPEC reemerges from reservoirs following urinary implantation in abacteriuric animals.

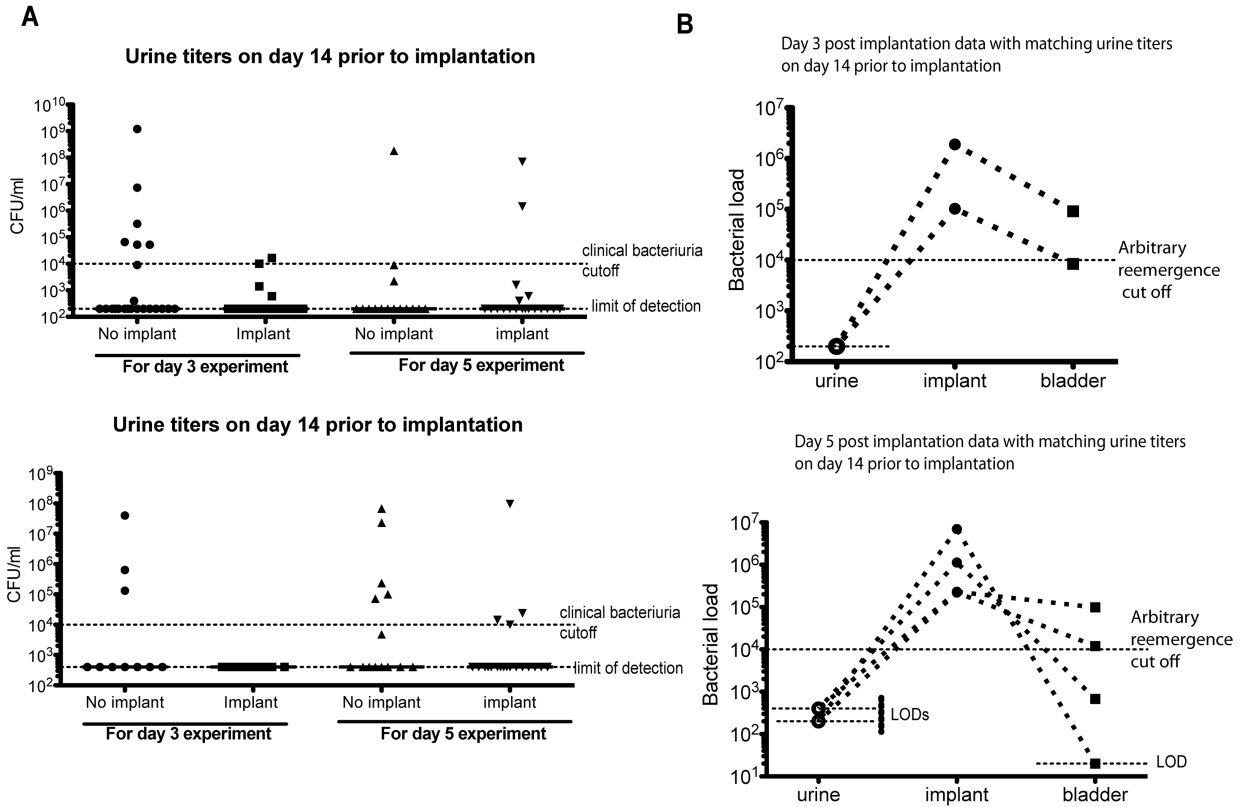

**(A)** Graphs represent bacterial titers from urine collected from non-implanted animals on day 14 post infection with marked strain UTI89HK::GFP from two independent experiments. “implant” group were implanted either for 3 days or 5 days and “no implant” group remained without implant. Only animals with urine titers at the limit of detection (LOD) for each experiment (200 or 400 CFU/ml) were considered abacteriuric and used for further analyses. **(B)** Graphs represent urine titers obtained on day 14 from non-implanted animals matched with the corresponding bacterial titers recovered from implants and bladders on day 3 (top) and 5 (bottom) post implantation of the same animals. Only implanted animals with reemerging infections (bacterial loads

$\geq 10^4$ CFU/implant or bladder) are displayed. None of the abacteriuric non-implanted animals had reemerging infections (Fig. 2 in the main manuscript). LOD for bladders=20CFU/ml

**S4. S pili and curli are not critical for UPEC virulence following urinary catheterization**

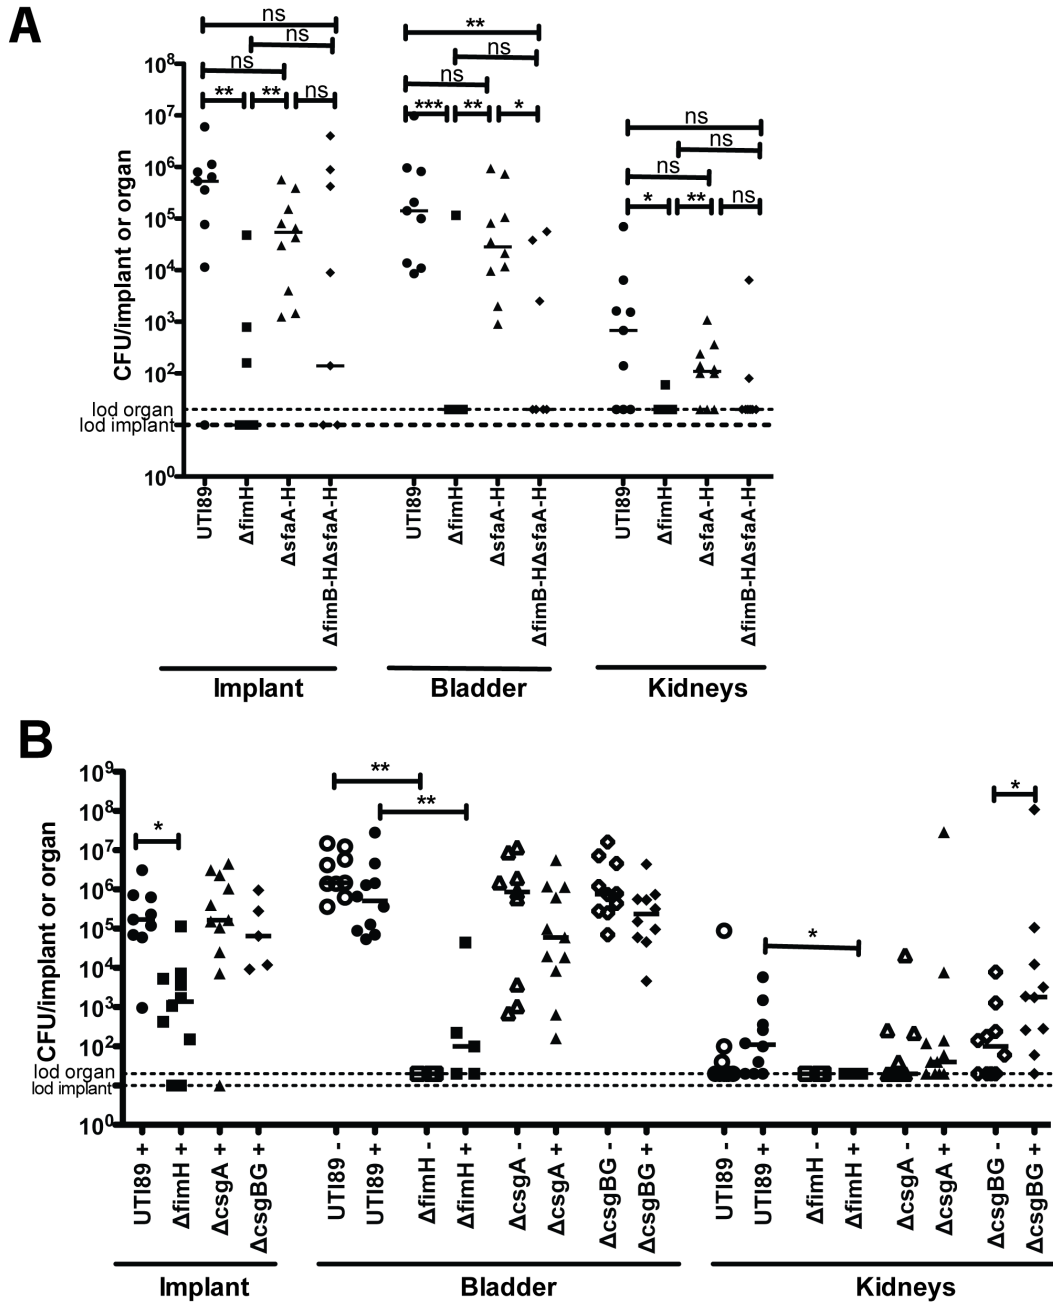

Graphs represent bacterial titers in log scale recovered at 24hpi from implants, homogenized bladders and kidneys of **(A)** implanted animals infected with either UTI89

(●) or UTI89 mutant strains deficient in type 1 pili,  $\Delta fimH$  (■), S pili  $\Delta sfaA-H$  (▲), both type 1 and S pili  $\Delta sfaA-H\Delta fimB-H$  (◆) and (B) non-implanted (open symbols) or implanted (closed symbols) animals infected with UTI89 (○,●),  $\Delta fimH$  (□, ■) or UTI89 mutant strains deficient in curli components  $\Delta csgA$  (△,▲) and  $\Delta csgB\Delta csgG$  (◆,◇). Horizontal dashed lines represent the limit of detection for viable bacteria. Each symbol represents a mouse from at least two independent experiments with n=5/group. The horizontal bars represent the median of each dataset; \* $p < 0.05$  and \*\*\* $p < 0.005$  \*\* $p < 0.0005$  by the Mann Whitney U test.

## S5. Methyl mannose inhibits UPEC biofilm in human urine

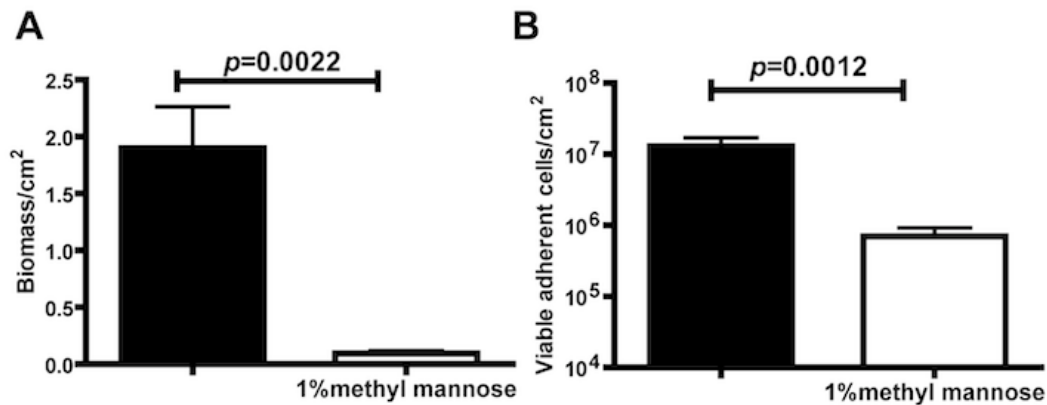

Graphs represent crystal violet based quantification (**A**) and CFU enumeration in logarithmic scale (log scale) (**B**) of 24h old UTI89 biofilms in human urine with or without 1% methyl mannose under flow on silicone tubings at 37°C indicating that methyl mannose prevents UPEC biofilm formation. Bars represent mean of three independent experiments, error bars indicate standard error of the mean (SEM). *p* values from Mann Whitney U test.
